# Supplementary material for: Validation of a risk stratification tool for fall-related injury in a state-wide cohort
Source: PubMed Central journal article supplement — BMJ Open. 2017 Feb 6;7(2):e012189. doi: 10.1136/bmjopen-2016-012189 (PMC5293982; doi:10.1136/bmjopen-2016-012189), 2017-02-06
Supplement: bmjopen-2016-012189supp_table2.pdf [file bmjopen-2016-012189supp_table2.pdf]

Supplemental Table 2: Bivariate comparisons of individuals who did or did not experience readmission for fall-related injury.

**90 Day Fall**

|                          | <b>Test Statistic</b> | <b>p value</b> |
|--------------------------|-----------------------|----------------|
| Private Payer            | $\chi^2 = 1.189e-56$  | p < .001       |
| Male                     | $\chi^2 = 0.2911$     | 0.2911         |
| White                    | $\chi^2 = 7.61e-16$   | p < .001       |
| Admission Psychiatric Dx | $\chi^2 = 0.0001597$  | p < .001       |
| Admission via ED         | $\chi^2 = 1.537e-18$  | p < .001       |
| Total medications        | $t = 4.072e-10$       | p < .001       |
| Age                      | $t = 0.0002198$       | p < .001       |
| Charlson                 | $t = 4.009e-38$       | p < .001       |
| Burden Score             | $t = 3.232e-09$       | p < .001       |

**180 Day Fall**

|                          | <b>Test Statistic</b> | <b>p value</b> |
|--------------------------|-----------------------|----------------|
| Private Payer            | $\chi^2 = 6.147e-108$ | p < .001       |
| Male                     | $\chi^2 = 0.1702$     | 0.1702         |
| White                    | $\chi^2 = 6.574e-33$  | p < .001       |
| Admission Psychiatric Dx | $\chi^2 = 2.98e-07$   | p < .001       |
| Admission via ED         | $\chi^2 = 2.952e-31$  | p < .001       |
| Total medications        | $t = 4.489e-18$       | p < .001       |

---

|              |                 |            |
|--------------|-----------------|------------|
| Age          | $t = 3.102e-07$ | $p < .001$ |
| Charlson     | $t = 5.797e-78$ | $p < .001$ |
| Burden Score | $t = 7.067e-18$ | $p < .001$ |

---
