# Supplementary material for: Validation of a risk stratification tool for fall-related injury in a state-wide cohort
Source: PubMed Central journal article supplement — BMJ Open. 2017 Feb 6;7(2):e012189. doi: 10.1136/bmjopen-2016-012189 (PMC5293982; doi:10.1136/bmjopen-2016-012189), 2017-02-06
Supplement: bmjopen-2016-012189supp_table3.pdf [file bmjopen-2016-012189supp_table3.pdf]

Supplemental Table 3. Medications with greatest burden score, and frequency of prescription within 15 days of hospital discharge.

| <b>Medication</b> | <b>2012 Discharge Prescriptions</b> | <b>Medication adverse effect burden score</b> |
|-------------------|-------------------------------------|-----------------------------------------------|
| Theophylline      | 20634                               | 3.65                                          |
| Risperidone       | 123737                              | 3.44                                          |
| Alprazolam        | 368487                              | 3.38                                          |
| Clomipramine      | 6360                                | 3.21                                          |
| Pregabalin        | 73768                               | 2.71                                          |
| Sodium Oxybate    | 396                                 | 2.59                                          |
| Olanzapine        | 83766                               | 2.58                                          |
| Tizanidine        | 77825                               | 2.52                                          |
| Quetiapine        | 226570                              | 2.52                                          |
| Clozapine         | 13698                               | 2.38                                          |
